# Supplementary material for: Racial Differences in Emergency Department Visit Characteristics and Management of Preadolescents at Risk of Suicide
Source: Atypon-hosted journal article supplement (doi:10.1176/appi.ps.202100608), 2022-09-27
Supplement: appi.ps.202100608.ds001.pdf [file appi.ps.202100608.ds001.pdf]

**Table 1 (Supplement): Descriptive statistics with comparisons using Chi-Square by race in demographics.**

| Variable                                                                                       |                    |    |                   |    |                    |    |                               |    | Test Statistic      |
|------------------------------------------------------------------------------------------------|--------------------|----|-------------------|----|--------------------|----|-------------------------------|----|---------------------|
|                                                                                                | Total<br>(N = 504) |    | White<br>(N= 120) |    | Black<br>(N = 345) |    | Other <sup>ε</sup><br>(N= 39) |    |                     |
|                                                                                                | N                  | %  | N                 | %  | N                  | %  | N                             | %  | χ <sup>2</sup> (df) |
| <b>Gender (n, %)</b>                                                                           |                    |    |                   |    |                    |    |                               |    |                     |
| <i>Male</i>                                                                                    | 285                | 57 | 69                | 58 | 196                | 57 | 20                            | 51 | 0.49 (2)            |
| <b>Ethnicity (n, %)</b>                                                                        |                    |    |                   |    |                    |    |                               |    |                     |
| <i>Non-Hispanic</i>                                                                            | 479                | 95 | 114               | 95 | 341                | 99 | 24                            | 62 | 132 (4)***          |
| <i>Hispanic</i>                                                                                | 18                 | 4  | 3                 | 3  | 1                  | 0  | 14                            | 36 |                     |
| <i>Refused or did not know</i>                                                                 | 7                  | 1  | 3                 | 3  | 3                  | 1  | 1                             | 3  |                     |
| <b>Urban (n, %)</b>                                                                            |                    |    |                   |    |                    |    |                               |    |                     |
| <i>Yes</i>                                                                                     | 344                | 69 | 49                | 41 | 275                | 80 | 20                            | 51 | 69 (4)***           |
| <b>Arrival Method (n, %)</b>                                                                   |                    |    |                   |    |                    |    |                               |    |                     |
| <i>Private</i>                                                                                 | 293                | 58 | 97                | 81 | 171                | 50 | 25                            | 64 | 41 (6)***           |
| <i>Police</i>                                                                                  | 142                | 28 | 14                | 12 | 122                | 35 | 6                             | 15 |                     |
| <i>Ambulance or Hospital</i>                                                                   | 57                 | 11 | 8                 | 7  | 43                 | 13 | 6                             | 15 |                     |
| <i>Public</i>                                                                                  | 12                 | 2  | 1                 | 1  | 9                  | 3  | 2                             | 5  |                     |
| <b>Primary ED Clinical Impression (n, %)<sup>±</sup></b>                                       |                    |    |                   |    |                    |    |                               |    |                     |
| <i>Suicidal Thoughts/Behaviors<sup>d</sup></i>                                                 | 120                | 24 | 37                | 31 | 72                 | 21 | 11                            | 28 | 20 (8)**            |
| <i>Other Externalizing Disorders &amp; Behaviors<sup>b</sup></i>                               | 142                | 28 | 37                | 31 | 97                 | 28 | 8                             | 21 |                     |
| <i>Other Internalizing Disorders &amp; Symptoms<sup>c</sup></i>                                | 48                 | 10 | 16                | 13 | 25                 | 7  | 7                             | 18 |                     |
| <i>Medical Concerns</i>                                                                        | 21                 | 4  | 2                 | 2  | 18                 | 5  | 1                             | 3  |                     |
| <i>Other<sup>d</sup></i>                                                                       | 173                | 34 | 28                | 23 | 133                | 39 | 12                            | 31 |                     |
| <b>ED Disposition</b>                                                                          |                    |    |                   |    |                    |    |                               |    |                     |
| <i>Discharged from ED</i>                                                                      | 446                | 89 | 95                | 80 | 321                | 93 | 30                            | 77 | 22 (4)***           |
| <b>ASQ5 (f/u question). Are you having thoughts of killing yourself right now?<sup>‡</sup></b> |                    |    |                   |    |                    |    |                               |    |                     |
|                                                                                                | Total<br>(N = 42)  |    | White<br>(N= 15)  |    | Black<br>(N = 22)  |    | Other <sup>ε</sup><br>(N= 5)  |    |                     |
| <i>Admitted to hospital inpatient psychiatric care</i>                                         | 11                 | 26 | 4                 | 27 | 4                  | 18 | 3                             | 60 | 9.8 (4)*            |
| <i>Transferred to another facility</i>                                                         | 3                  | 7  | 3                 | 20 | 0                  | 0  | 0                             | 0  |                     |
| <i>Discharged from ED</i>                                                                      | 28                 | 67 | 8                 | 53 | 18                 | 82 | 2                             | 40 |                     |

\*\*\*=  $p \leq 0.001$ ; \*\*=  $p \leq 0.01$ ; \*=  $p \leq 0.05$

**Table 2 (Supplement): Descriptive statistics by arrival mode**

| Variable                                                                                                        |              |     |                         |    |            |    |                   |    |            |    | Test<br>Statistic |
|-----------------------------------------------------------------------------------------------------------------|--------------|-----|-------------------------|----|------------|----|-------------------|----|------------|----|-------------------|
|                                                                                                                 | Total sample |     | Ambulance<br>& hospital |    | Private    |    | Public &<br>Other |    | Police     |    |                   |
|                                                                                                                 | N            | %   | N                       | %  | N          | %  | N                 | %  | N          | %  | $\chi^2$ (df)     |
|                                                                                                                 | <b>504</b>   | 100 | <b>57</b>               | 11 | <b>293</b> | 58 | <b>12</b>         | 2  | <b>142</b> | 28 |                   |
| <b>Gender (n, %)</b>                                                                                            |              |     |                         |    |            |    |                   |    |            |    |                   |
| <i>Male</i>                                                                                                     | 285          | 57  | 20                      | 35 | 171        | 58 | 4                 | 33 | 90         | 63 | 16 (3)***         |
| <b>Race (n, %)</b>                                                                                              |              |     |                         |    |            |    |                   |    |            |    |                   |
| <i>White</i>                                                                                                    | 120          | 24  | 8                       | 14 | 97         | 33 | 1                 | 8  | 14         | 10 | 41 (6)***         |
| <i>Black</i>                                                                                                    | 345          | 69  | 43                      | 75 | 171        | 58 | 9                 | 75 | 122        | 86 |                   |
| <i>Others or mixed</i>                                                                                          | 39           | 8   | 6                       | 11 | 25         | 9  | 2                 | 17 | 6          | 4  |                   |
| <b>Urban (n, %)</b>                                                                                             |              |     |                         |    |            |    |                   |    |            |    |                   |
| <i>Yes</i>                                                                                                      | 345          | 69  | 42                      | 74 | 164        | 56 | 11                | 92 | 128        | 90 | 56 (3)***         |
| <b>Primary ED Clinical<br/>Impression (n, %)<sup>±</sup></b>                                                    |              |     |                         |    |            |    |                   |    |            |    |                   |
| <i>Suicidal<br/>Thoughts/Behaviors<sup>a</sup></i>                                                              | 120          | 24  | 13                      | 23 | 85         | 29 | 4                 | 33 | 18         | 13 | 48 (12)***        |
| <i>Other Externalizing<br/>Disorders &amp; Behaviors<sup>b</sup></i>                                            | 142          | 28  | 19                      | 33 | 62         | 21 | 1                 | 8  | 60         | 42 |                   |
| <i>Other Internalizing<br/>Disorders &amp; Symptoms<sup>c</sup></i>                                             | 48           | 10  | 4                       | 7  | 36         | 12 | 3                 | 25 | 5          | 4  |                   |
| <i>Medical Concerns</i>                                                                                         | 21           | 4   | 3                       | 5  | 6          | 2  | 1                 | 8  | 11         | 8  |                   |
| <i>Other</i>                                                                                                    | 173          | 34  | 18                      | 32 | 104        | 36 | 3                 | 25 | 48         | 34 |                   |
| <b>ASQ1. In the past few weeks, have you wished you were dead?</b>                                              |              |     |                         |    |            |    |                   |    |            |    |                   |
| <i>Yes</i>                                                                                                      | 165/395      | 42  | 13/37                   | 35 | 110/234    | 47 | 8/11              | 73 | 34/113     | 30 | 14 (3)**          |
| <b>ASQ2. In the past few weeks, have you felt that you or your family would be better off if you were dead?</b> |              |     |                         |    |            |    |                   |    |            |    |                   |
| <i>Yes</i>                                                                                                      | 124/392      | 32  | 16/38                   | 42 | 80/232     | 35 | 4/11              | 36 | 24/111     | 22 | 8 (3)*            |
| <b>ASQ3. In the past week, have you had thoughts about killing yourself?</b>                                    |              |     |                         |    |            |    |                   |    |            |    |                   |
| <i>Yes</i>                                                                                                      | 148/400      | 37  | 17/38                   | 45 | 94/238     | 40 | 6/11              | 55 | 31/113     | 27 | 8 (3)             |
| <b>ASQ4. Have you ever tried to kill yourself?</b>                                                              |              |     |                         |    |            |    |                   |    |            |    |                   |
| <i>Yes</i>                                                                                                      | 110/396      | 28  | 9/39                    | 23 | 71/233     | 31 | 5/10              | 50 | 25/114     | 22 | 6 (3)             |
| <b>ASQ5 (f/u question). Are you having thoughts of killing yourself right now?<sup>y</sup></b>                  |              |     |                         |    |            |    |                   |    |            |    |                   |
| <i>Yes</i>                                                                                                      | 42/221       | 19  | 7/22                    | 32 | 21/144     | 15 | 2/9               | 22 | 12/46      | 26 | 6 (3)             |
| <b>ED Disposition</b>                                                                                           |              |     |                         |    |            |    |                   |    |            |    |                   |
| <i>Discharged from ED</i>                                                                                       | 446          | 89  | 48                      | 84 | 253        | 86 | 11                | 92 | 134        | 94 | 7 (3)             |

\*p≤0.05; \*\*p≤0.01; \*\*\*p≤0.001

**Table 3 (Supplement): Descriptive statistics and comparisons in ASQ items by clinical impression category**

| Variable                                                                                                        |              |     |                                              |    |                                      |    |                                      |    |           |   |                    |    | Test Statistic |
|-----------------------------------------------------------------------------------------------------------------|--------------|-----|----------------------------------------------|----|--------------------------------------|----|--------------------------------------|----|-----------|---|--------------------|----|----------------|
|                                                                                                                 | Total sample |     | Suicidal Thoughts and Behaviors <sup>a</sup> |    | Externalizing Behaviors <sup>b</sup> |    | Internalizing Behaviors <sup>c</sup> |    | Medical   |   | Other <sup>d</sup> |    |                |
|                                                                                                                 | N            | %   | N                                            | %  | N                                    | %  | N                                    | %  | N         | % | N                  | %  | $\chi^2$ (df)  |
|                                                                                                                 | <b>504</b>   | 100 | <b>106</b>                                   | 27 | <b>101</b>                           | 26 | <b>42</b>                            | 11 | <b>18</b> | 5 | <b>128</b>         | 32 |                |
| <b>ASQ1. In the past few weeks, have you wished you were dead?</b>                                              |              |     |                                              |    |                                      |    |                                      |    |           |   |                    |    |                |
| Yes                                                                                                             | 165/395      | 41  | 81                                           | 49 | 22                                   | 13 | 22                                   | 13 | 5         | 3 | 35                 | 21 | 83 (4)***      |
| <b>ASQ2. In the past few weeks, have you felt that you or your family would be better off if you were dead?</b> |              |     |                                              |    |                                      |    |                                      |    |           |   |                    |    |                |
| Yes                                                                                                             | 124/392      | 32  | 65                                           | 52 | 8                                    | 7  | 18                                   | 15 | 4         | 3 | 29                 | 23 | 76 (4)***      |
| <b>ASQ3. In the past week, have you had thoughts about killing yourself?</b>                                    |              |     |                                              |    |                                      |    |                                      |    |           |   |                    |    |                |
| Yes                                                                                                             | 148/400      | 37  | 77                                           | 52 | 20                                   | 14 | 17                                   | 12 | 3         | 2 | 31                 | 21 | 80 (4)***      |
| <b>ASQ4. Have you ever tried to kill yourself?</b>                                                              |              |     |                                              |    |                                      |    |                                      |    |           |   |                    |    |                |
| Yes                                                                                                             | 110/396      | 28  | 46                                           | 42 | 16                                   | 15 | 14                                   | 13 | 1         | 1 | 33                 | 30 | 27 (4)***      |
| <b>ASQ5 (f/u question). Are you having thoughts of killing yourself right now?<sup>‡</sup></b>                  |              |     |                                              |    |                                      |    |                                      |    |           |   |                    |    |                |
| Yes                                                                                                             | 42/221       | 19  | 28                                           | 67 | 5                                    | 12 | 2                                    | 5  | 1         | 2 | 6                  | 14 | 13 (4)*        |
| <b>ED Disposition</b>                                                                                           |              |     |                                              |    |                                      |    |                                      |    |           |   |                    |    |                |
| Discharged from ED                                                                                              | 446          | 88  | 92                                           | 21 | 129                                  | 29 | 39                                   | 9  | 20        | 5 | 166                | 37 | 30 (4)***      |

\*p<0.05; \*\*p<0.01; \*\*\*p<0.001

€ = Includes Asian, Native American, Mixed Race, and two or more races

‡Primary ED clinical impression was obtained by data extraction from the EMR.

a = A primary ED clinical impression of “Suicidal Thoughts and Behaviors” was defined as having suicidal ideations or recent suicide attempt as the primary reason for the ED visit.

b = A primary ED clinical impression of “Other Externalizing disorders and behaviors” was defined as having a diagnosis of Attention-Hyperactivity Deficit Disorder, Oppositional Defiant Disorder, Aggressive Behaviors, or disruptive behavior disorders and that problems/impairment related to this diagnosis were the primary reason for the ED visit.

c = A primary ED clinical impression of “Other Internalizing disorders and symptoms” was defined as having a diagnosis of Depression, Anxiety, Grief reactions, and Panic Attacks, or other mood disorder or symptoms and that problems/impairment related to this diagnosis were the primary reason for the ED visit.

d = A primary ED clinical impression of “Other” was defined as having a substance use-related presentation, accidental ingestions, and child abuse cases as the primary reason for the ED visit.

‡ASQ item 5 (also known as the ASQ follow-up item) was administered to all respondents who screened positive by responding “Yes” on any of the ASQ screening items (#1-4).
